# Supplementary material for: A novel flame-resistant separator for high performance lithium–sulfur batteries
Source: Royal Society of Chemistry journal article supplement (doi:10.1039/d2ma00576j), 2022-01-01
Supplement: d2ma00576j1.pdf [file d2ma00576j1.pdf]

## *Support Information*

### **A Novel Flame-Resistant Separator for High Performance**

### **Lithium-Sulfur Battery**

Jianyi Wang<sup>†a</sup>, Menghui Chen<sup>†c</sup>, Weiwei Qin <sup>\*a,b</sup>, Meng Zhou<sup>b</sup>

---

<sup>a</sup> Faculty of Geosciences and Environmental Engineering, Southwest Jiaotong University, Chengdu 611756, China

<sup>b</sup> Chemical and Materials Engineering Department, New Mexico State University, Las Cruces, NM 88003, USA

<sup>c</sup> Institute for Sustainable Energy/College of Sciences, Shanghai University, Shanghai, 200444, China

<sup>†</sup> These authors contributed equally.

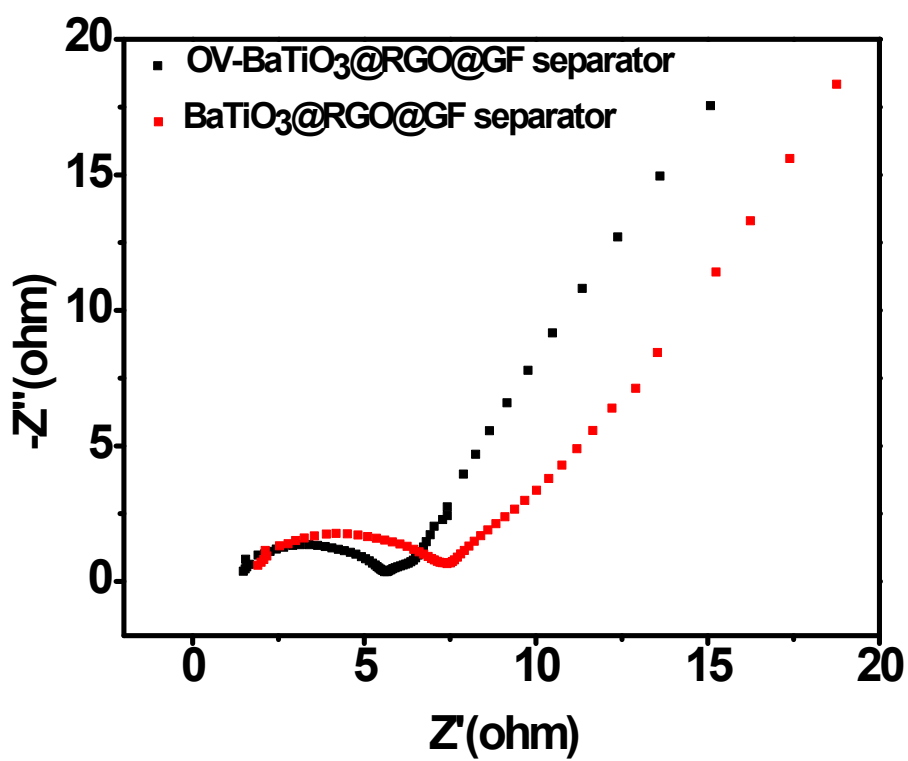

**Figure S1** Electrochemical Impedance Spectroscopy (EIS) after 200 cycles of the different BaTiO<sub>3</sub>-based separators in LSB and inset is corresponding the equivalent-circuit diagram.

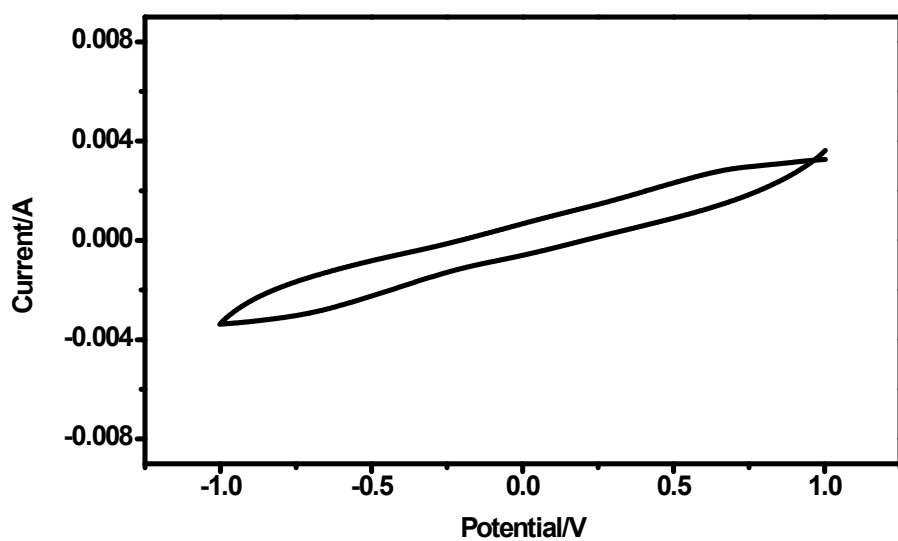

**Figure S2** CV curves of the symmetric cells with cathode of RGO in an electrolyte with  $\text{Li}_2\text{S}_6$  at  $10 \text{ mV s}^{-1}$ .

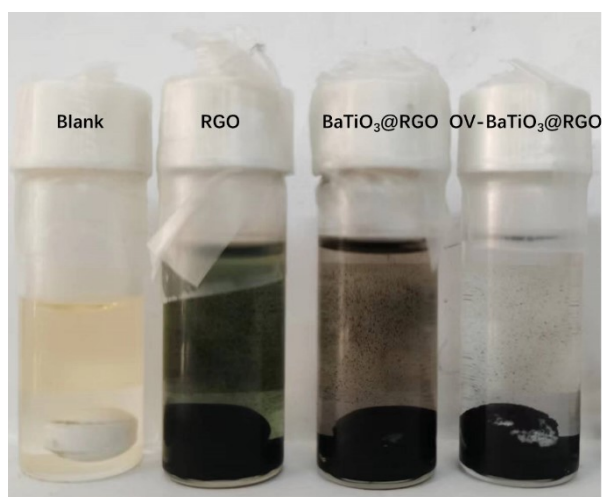

**Figure S3** The photograph of sealed vials containing of polysulfides solution after adsorption for one day with different materials of separator coating.

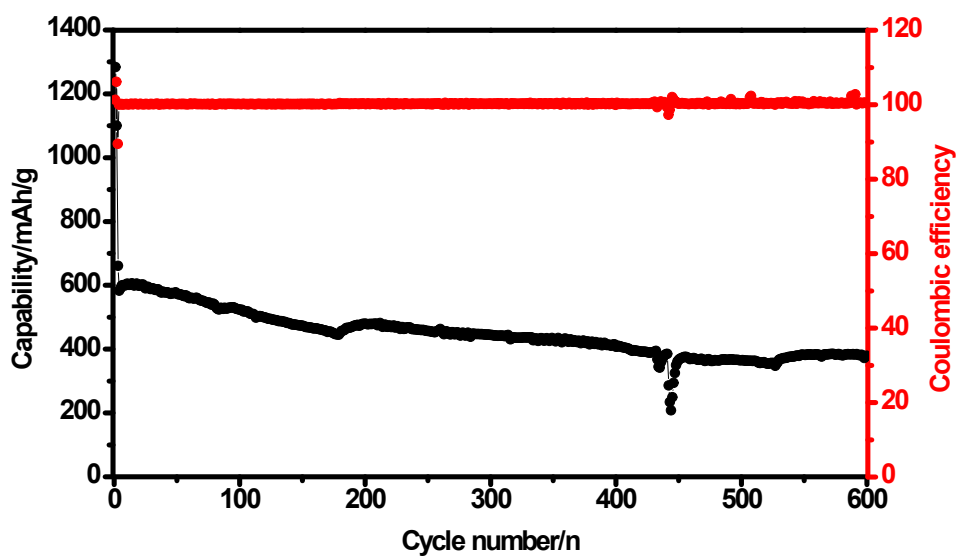

**Figure S4** Cycling performance of OV-BaTiO<sub>3</sub>@RGO@GF separator at a 2 A g<sup>-1</sup> rate for 600 cycles.

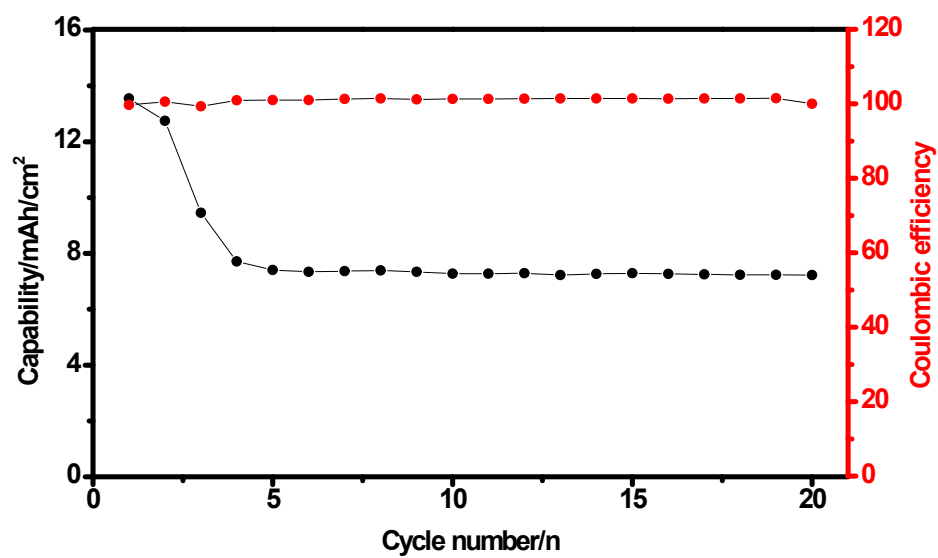

**Figure S5** Cycling performance of OV-BaTiO<sub>3</sub>@RGO@GF separator at a 0.2 A g<sup>-1</sup> rate under a high loading of 10 mg cm<sup>-2</sup>.

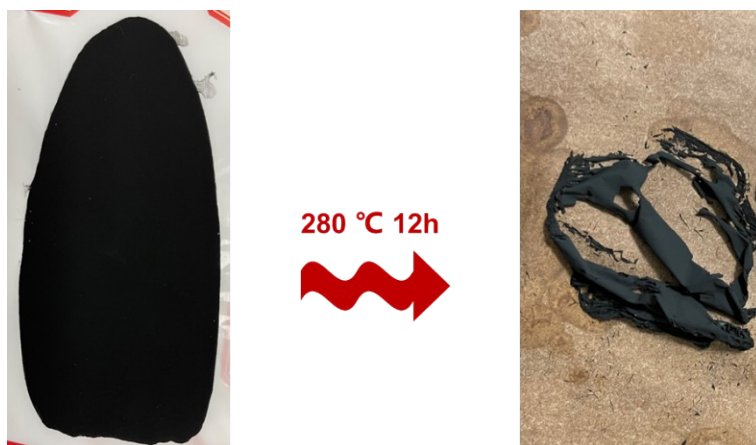

**Figure S6** The OV-BaTiO<sub>3</sub>@RGO@PP separator c after heat treatment.

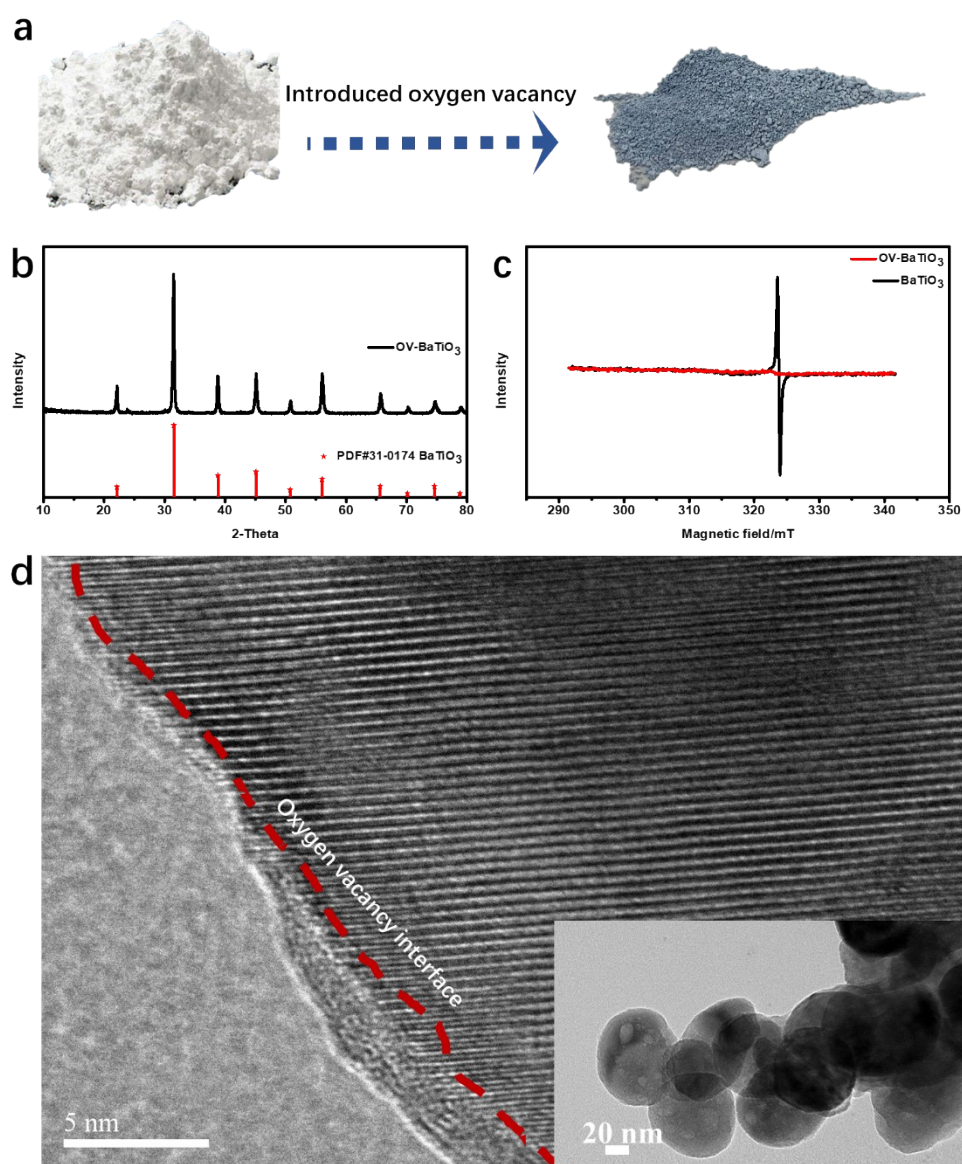

**Figure S7** (a) Photograph of pristine and oxygen vacancy of  $\text{BaTiO}_3$  (OV- $\text{BaTiO}_3$ ). (b) XRD patterns of OV- $\text{BaTiO}_3$ . (c) EPR of  $\text{BaTiO}_3$  and OV- $\text{BaTiO}_3$ . (d) HR-TEM image of OV- $\text{BaTiO}_3$  and TEM image of OV- $\text{BaTiO}_3$  at bottom left, respectively.

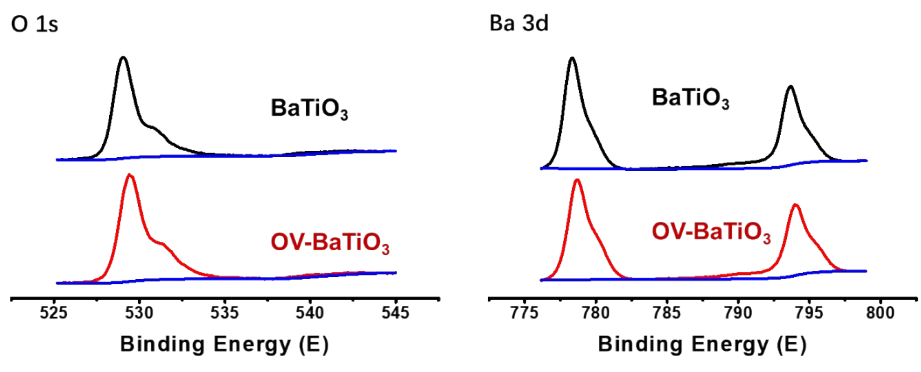

**Figure S8** Comparing pristine BaTiO<sub>3</sub> and OV-BaTiO<sub>3</sub>: O1s and Ba<sub>3d</sub> XPS spectra.
